# Supplementary material
Source: HighWire-hosted journal article supplement (https://qualitysafety.bmj.com/highwire/filestream/160495/field_highwire_adjunct_files/3/bmjqs-2021-013522supp004_data_supplement.pdf)

## SUPPLEMENTARY FIGURES

Supplementary Figure 1: Flow chart showing the data extraction and cleaning process for the selected operation types.

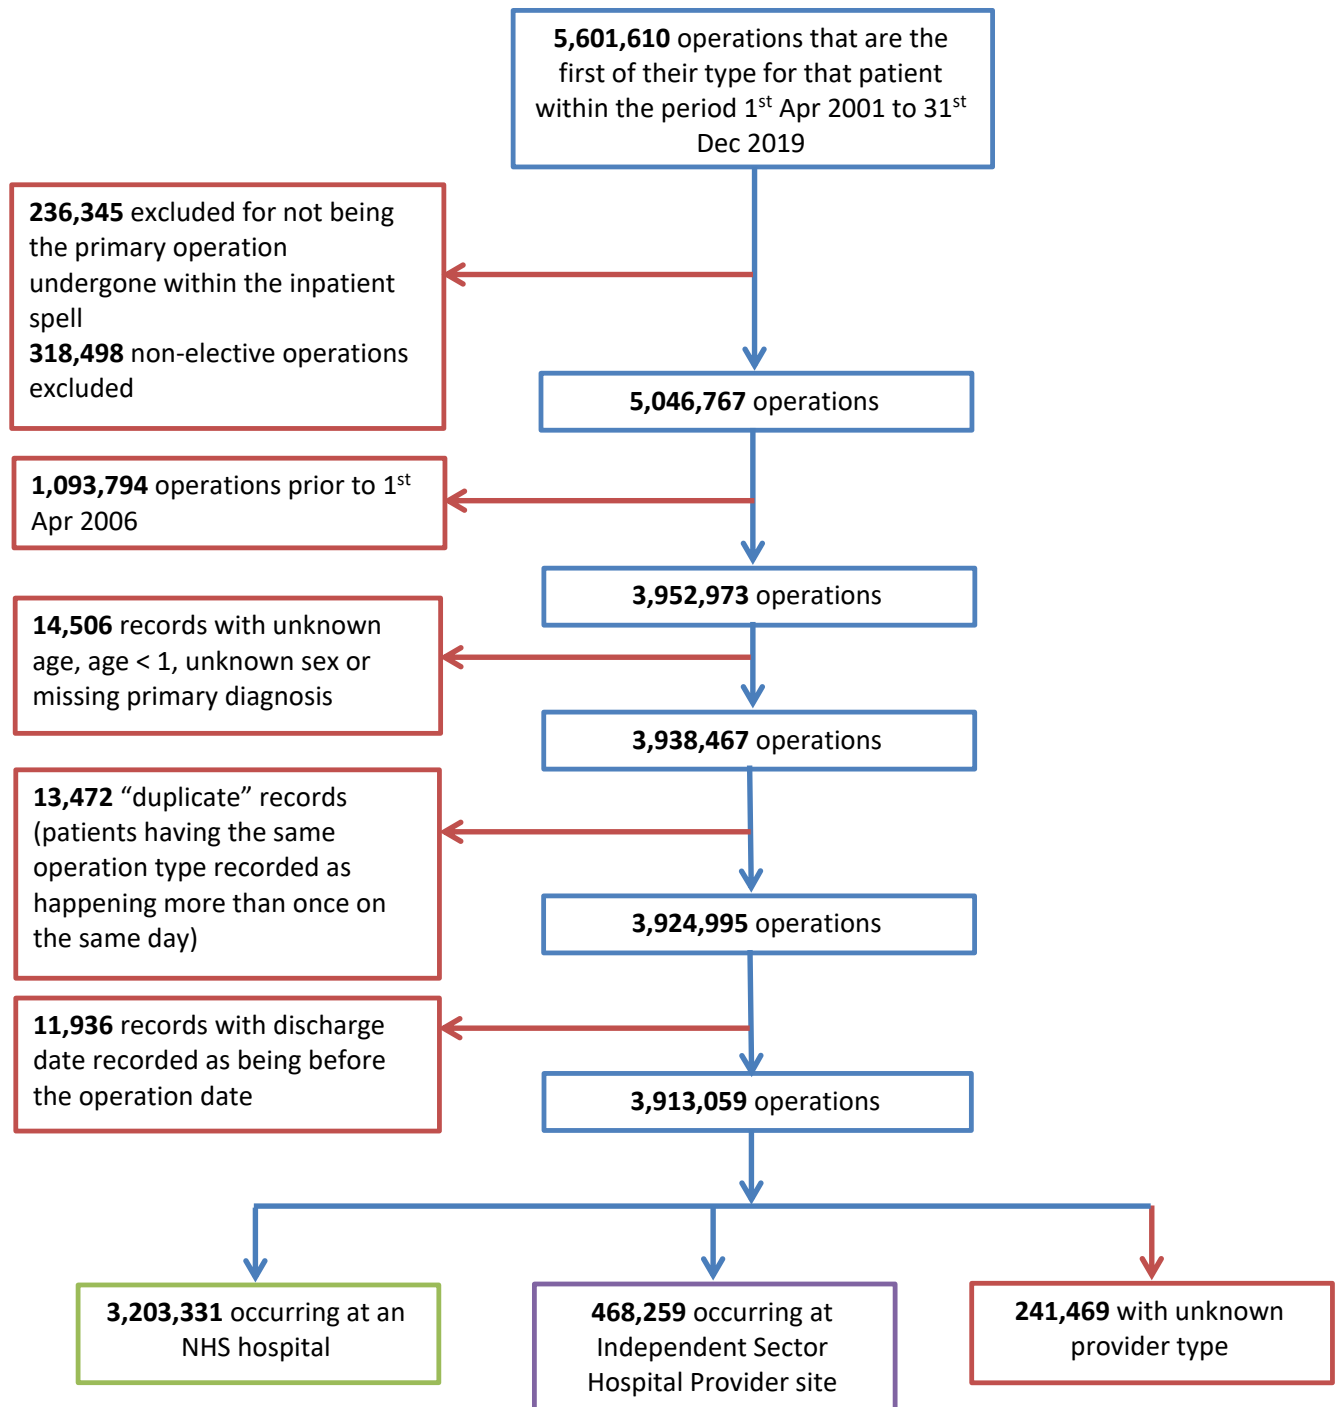

Supplement: bmjqs-2021-013522supp004_data_supplement.pdf [file bmjqs-2021-013522supp004_data_supplement.pdf]
